# Supplementary material
Source: PubMed Central journal article supplement (PMC6369752)

Click blue boxes to link to additional images

[Fluor Image](#)

[Profile view](#)

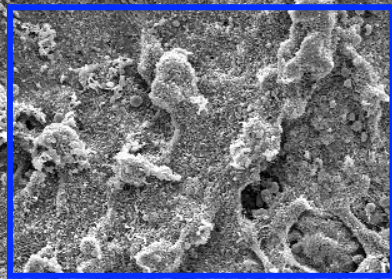

Back to 200X

Colorized

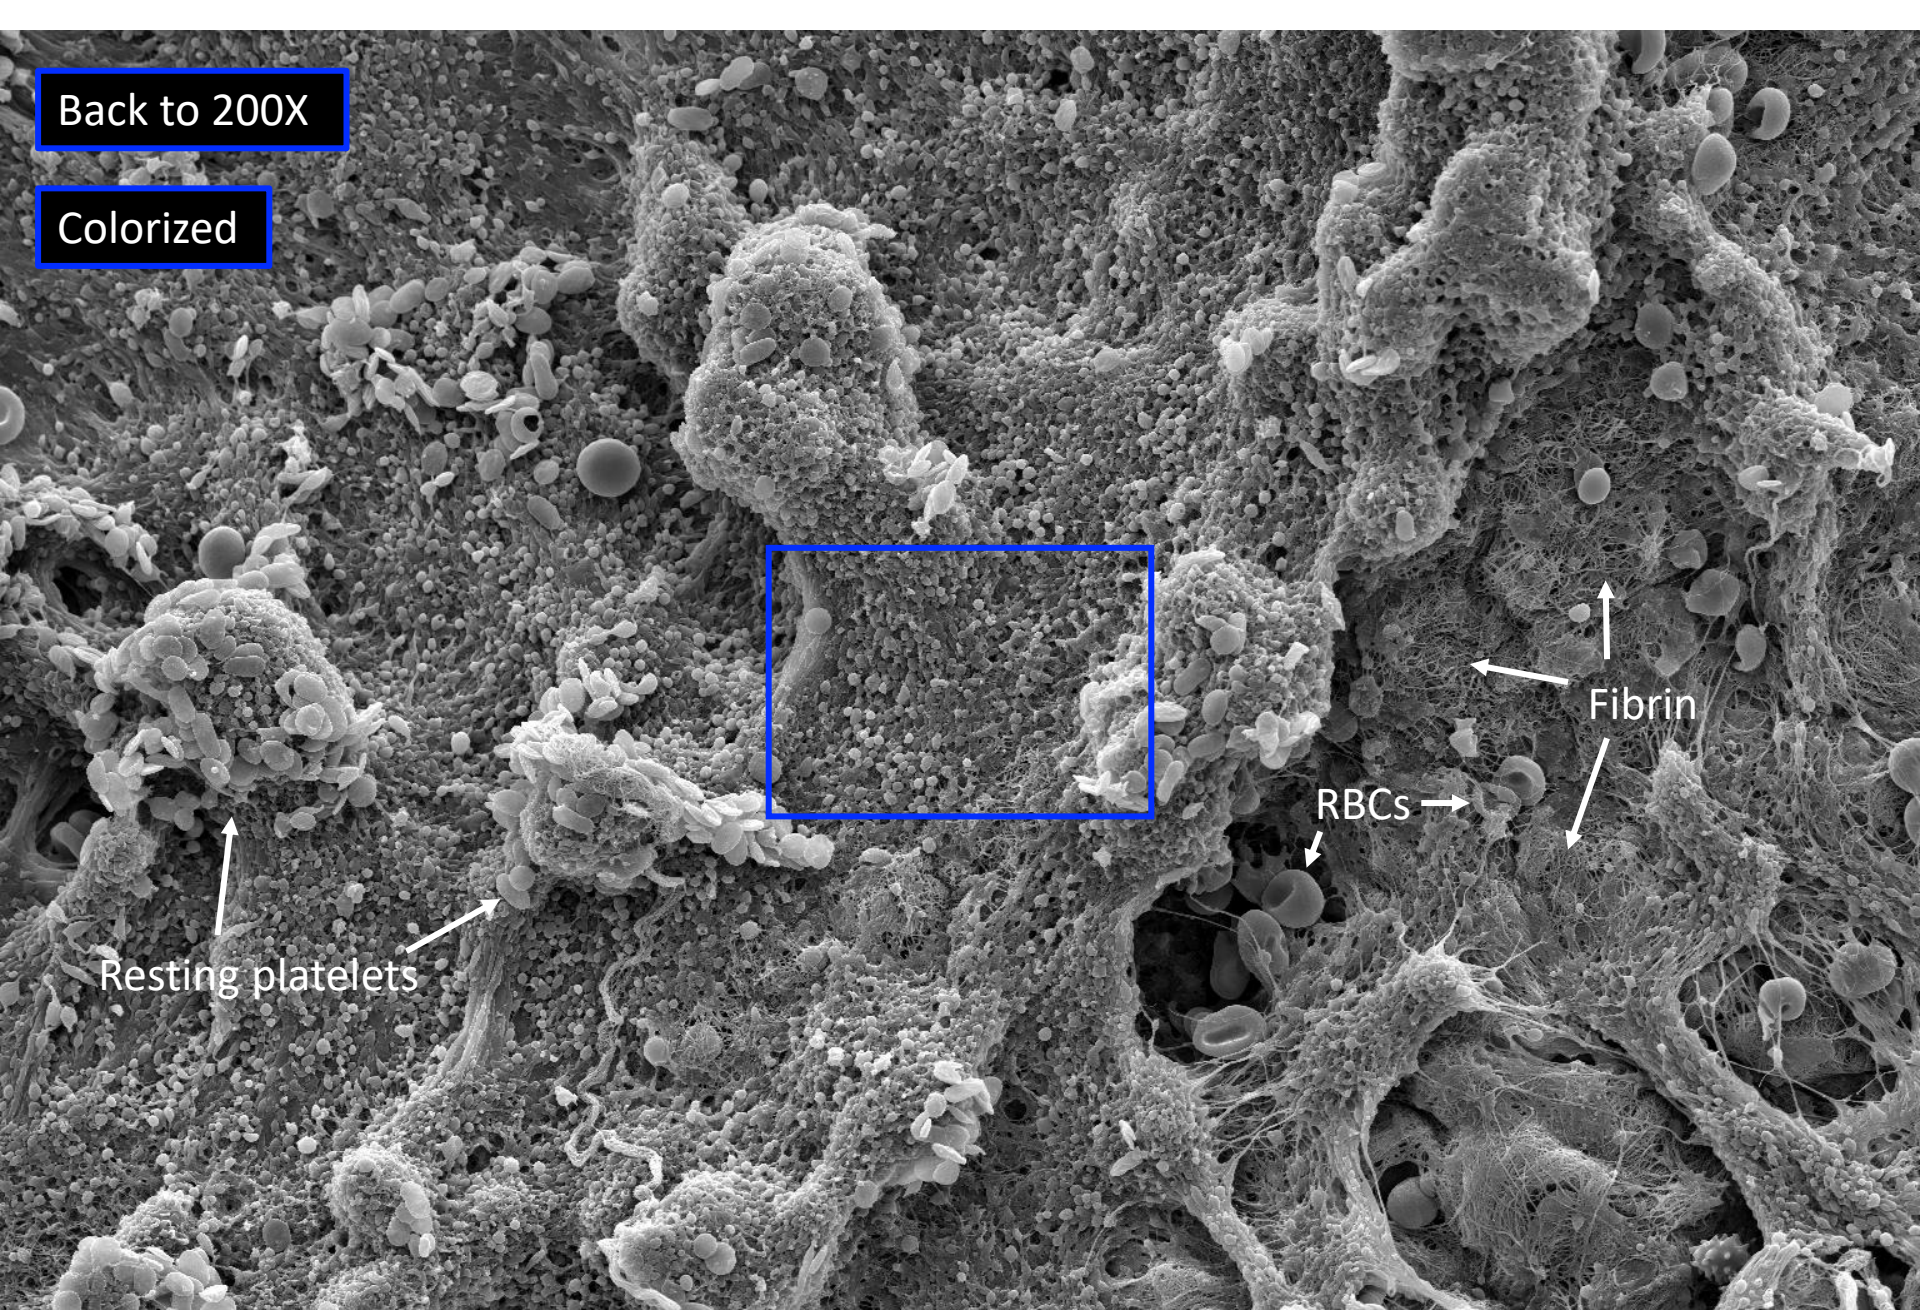

Resting platelets

RBCs

Fibrin

Back to 200X

Grayscale

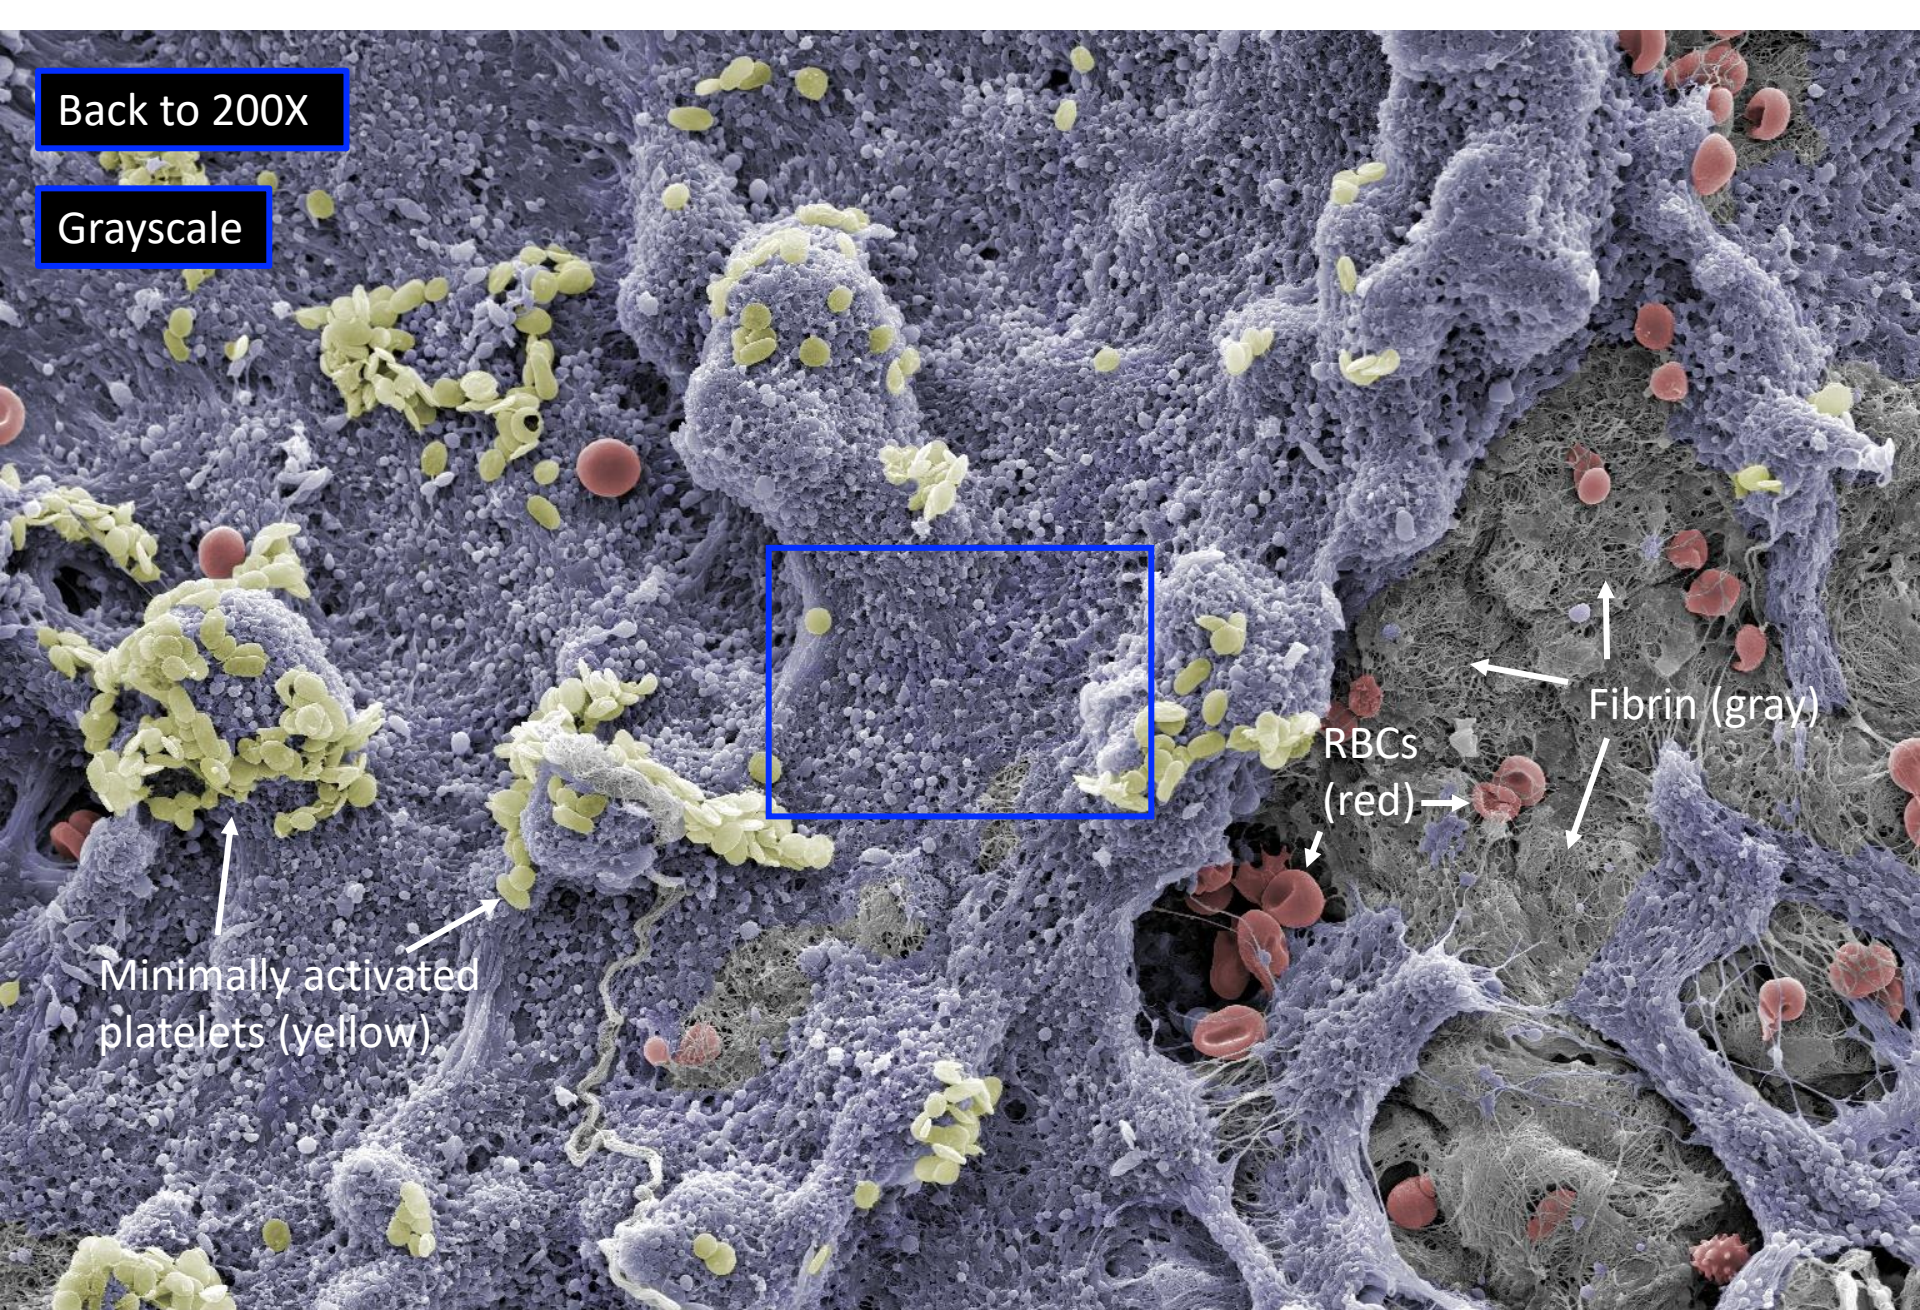

Minimally activated platelets (yellow)

RBCs (red)

Fibrin (gray)

Back to 200X

Resting platelet

Fibrin

|                                                                                   |                                                                                         |          |     |        |    |
|-----------------------------------------------------------------------------------|-----------------------------------------------------------------------------------------|----------|-----|--------|----|
|  | mag  | mode     | HV  | spot   | WD |
| 5 000 x                                                                           | SE                                                                                      | 10.00 kV | 3.0 | 9.4 mm |    |

10  $\mu$ m

052417\_MIV\_JUG\_OUT\_04

Back to 200X

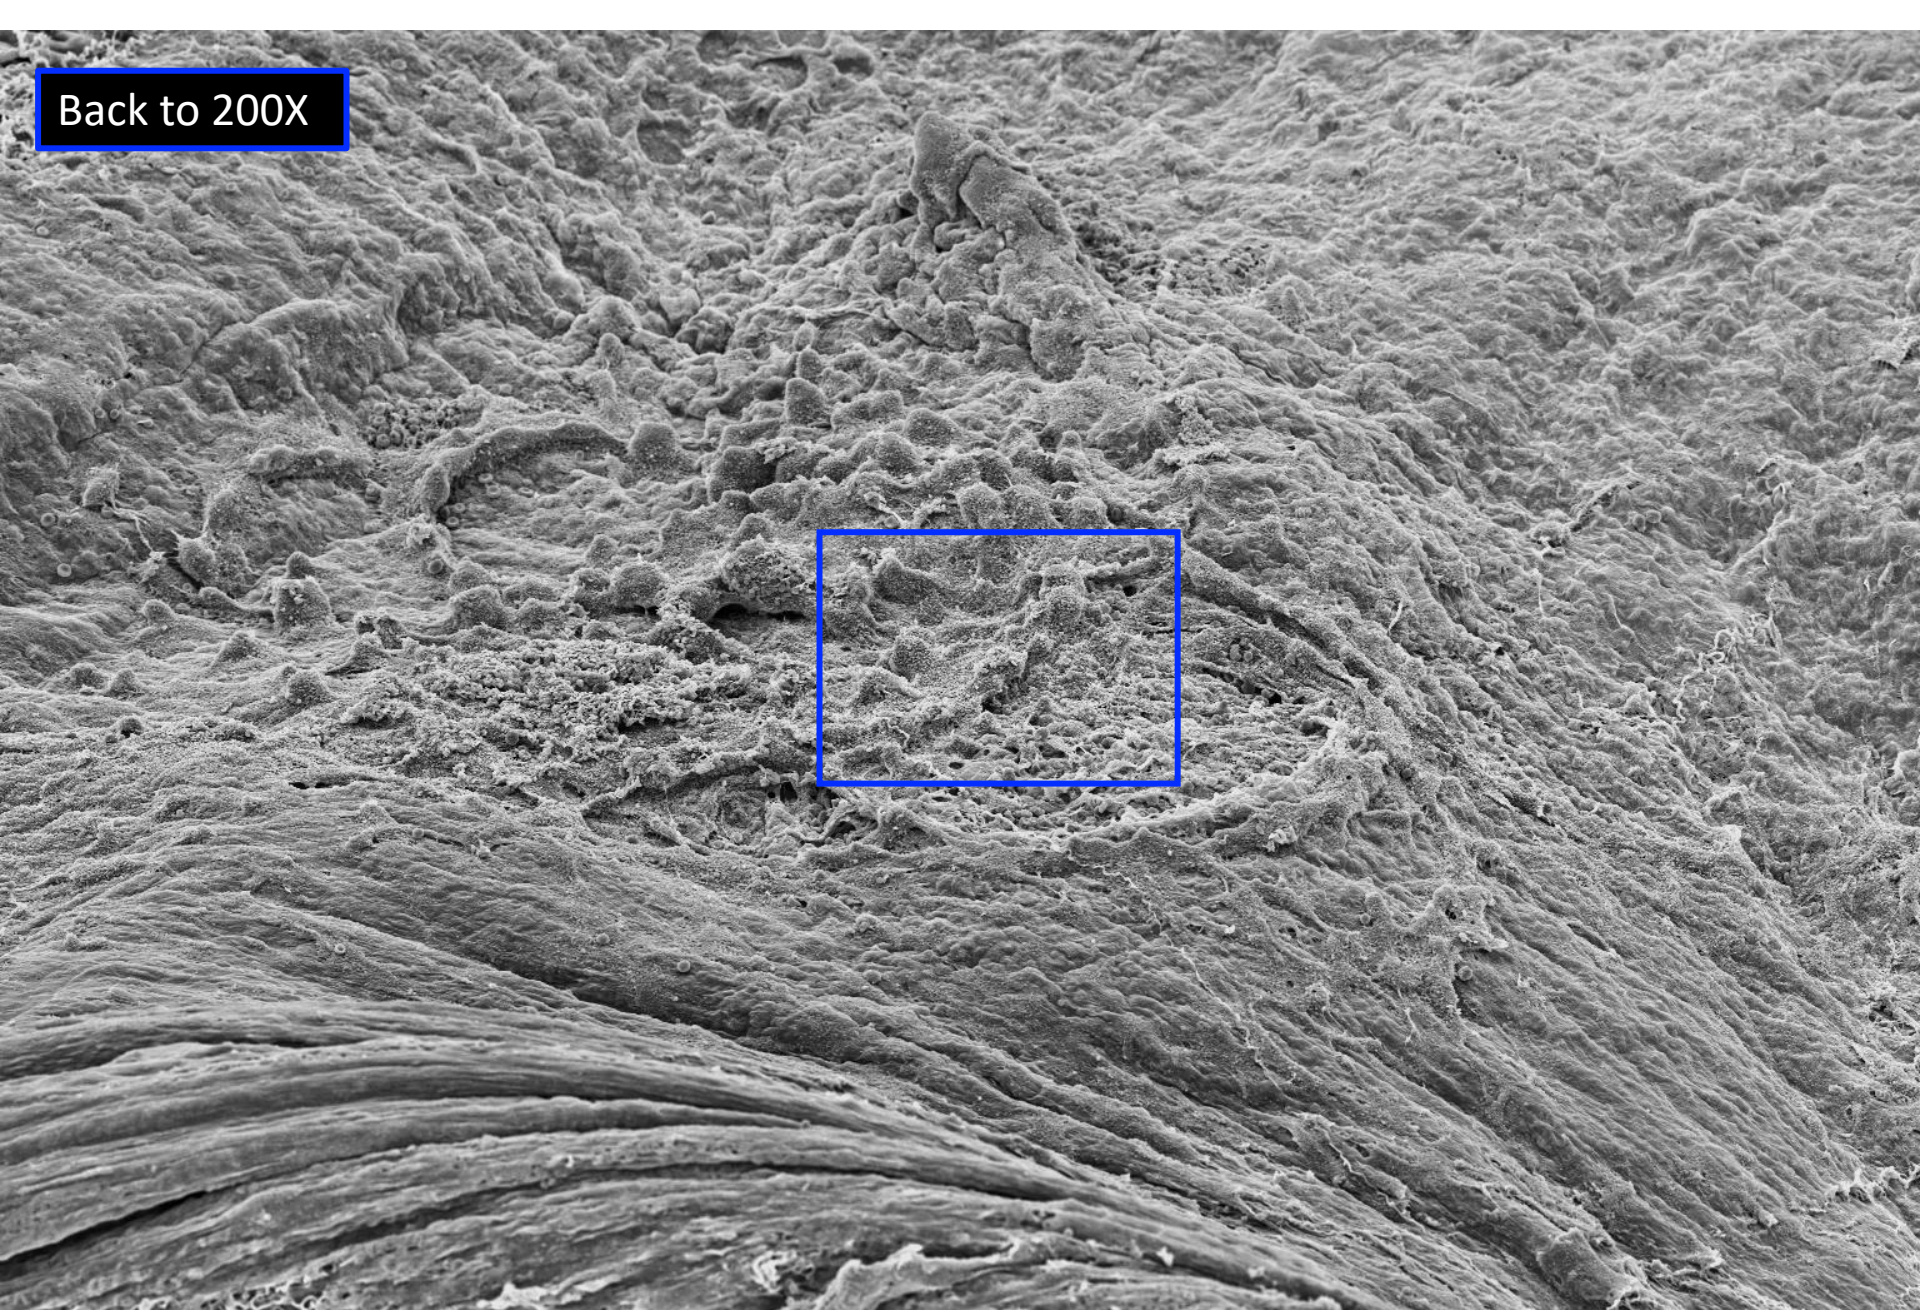

Back to 200X

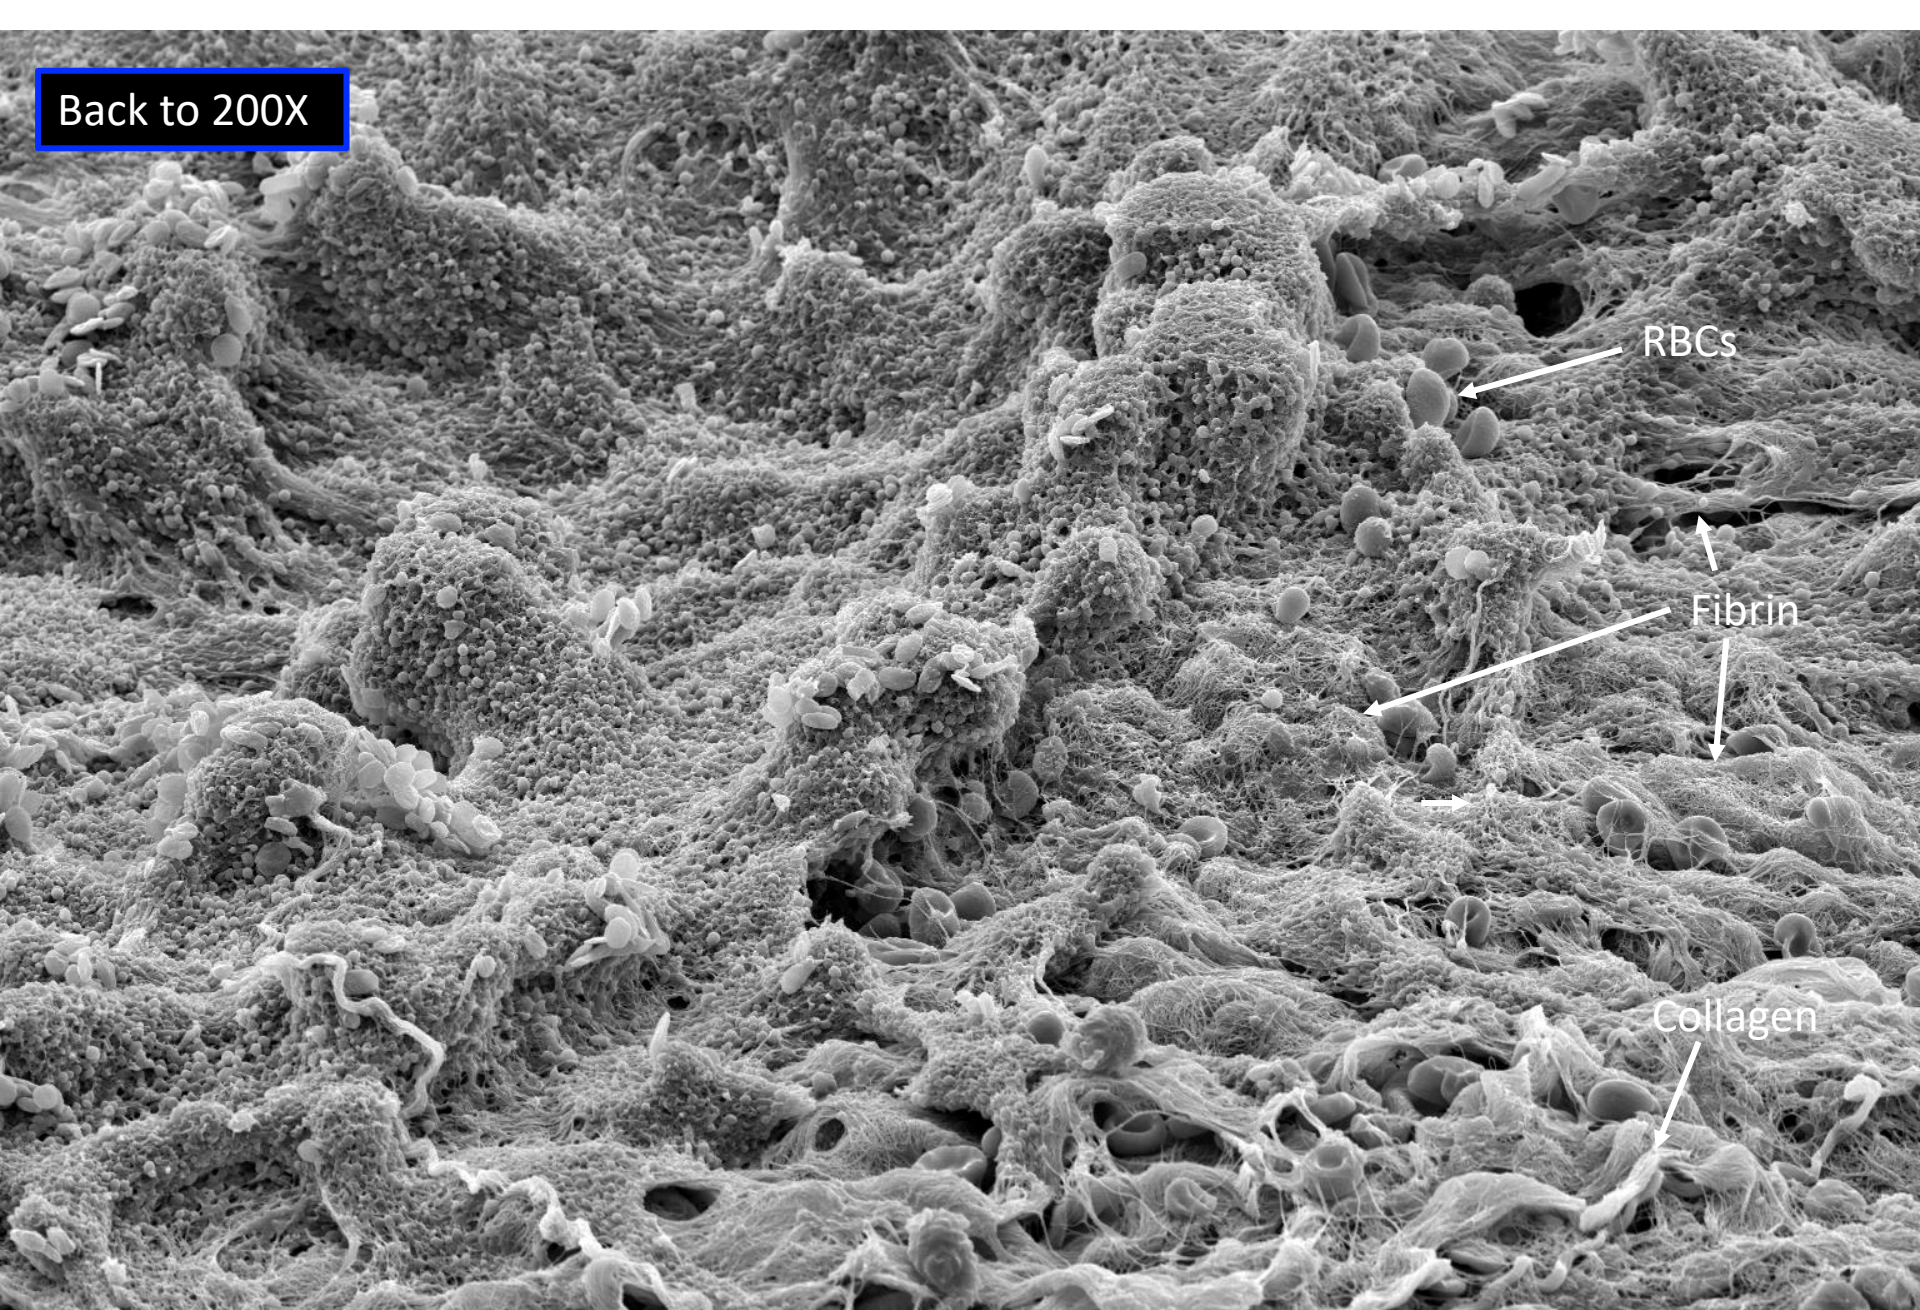

RBCs

Fibrin

Collagen

Back to 200X

CD41 (platelets)  
Fibrin

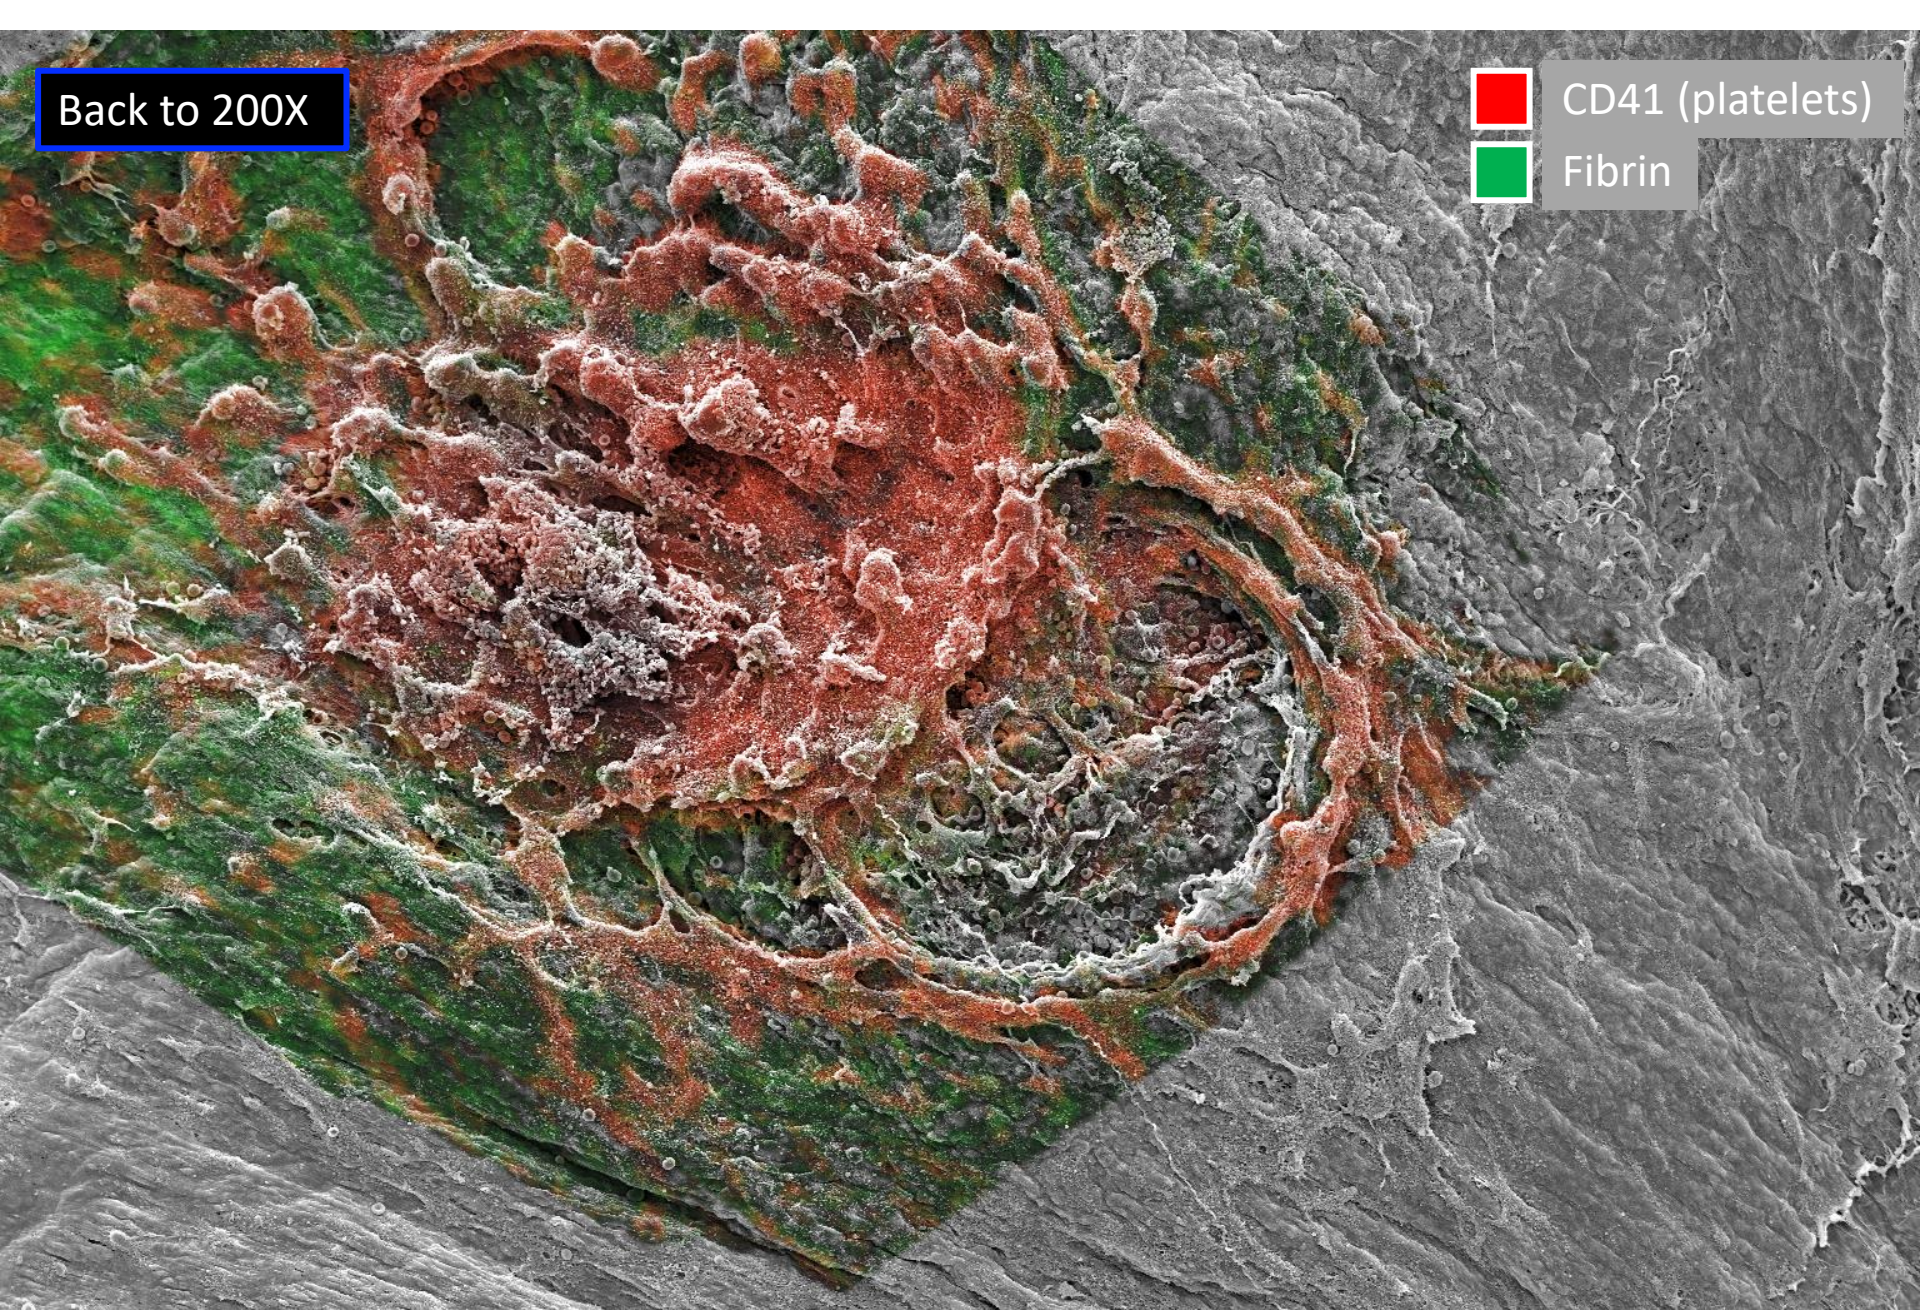

Supplement: pnas.1813642116.sd02.pdf [file pnas.1813642116.sd02.pdf]
